# Supplementary material for: Metabolomics analysis: Finding out metabolic building blocks
Source: PubMed Central journal article supplement (PMC5426688; doi:10.1371/journal.pone.0177031), 2017-05-11

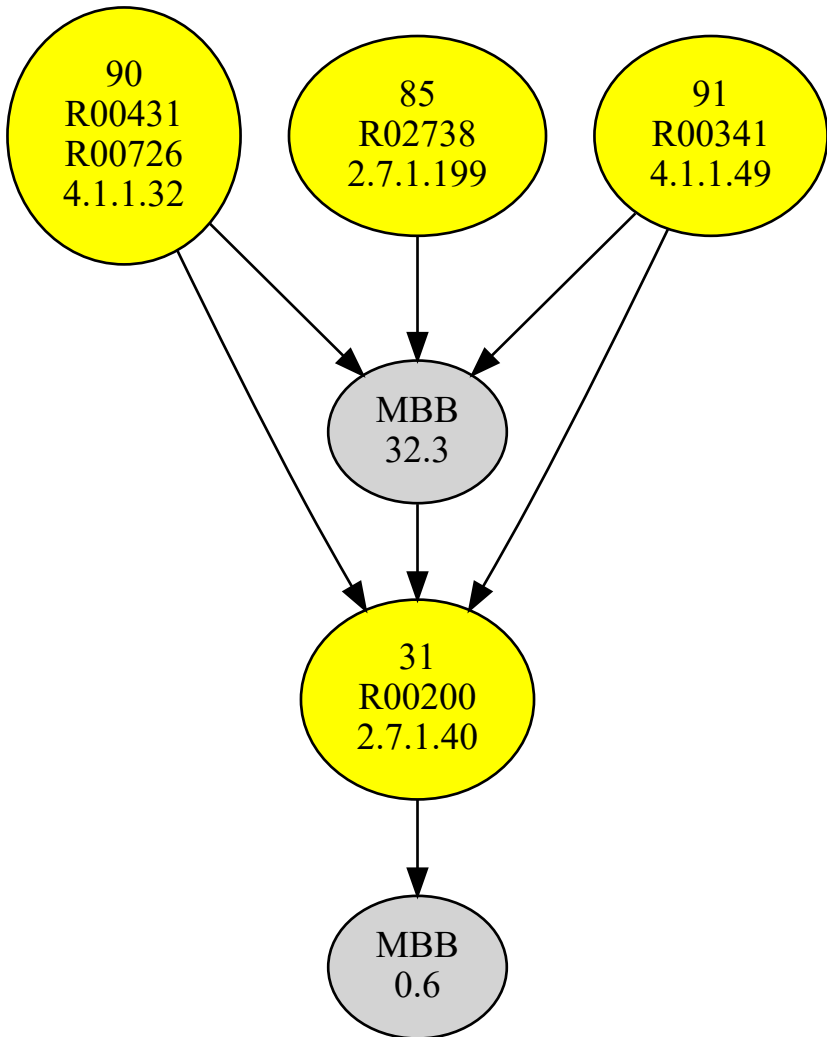

Supplement: pone.0177031.s022.pdf [file pone.0177031.s022.pdf]
