# Supplementary material for: Metabolomics analysis: Finding out metabolic building blocks
Source: PubMed Central journal article supplement (PMC5426688; doi:10.1371/journal.pone.0177031), 2017-05-11

- Animalia
- Plantae
- Fungi
- Protista
- Bacteria
- Archaea

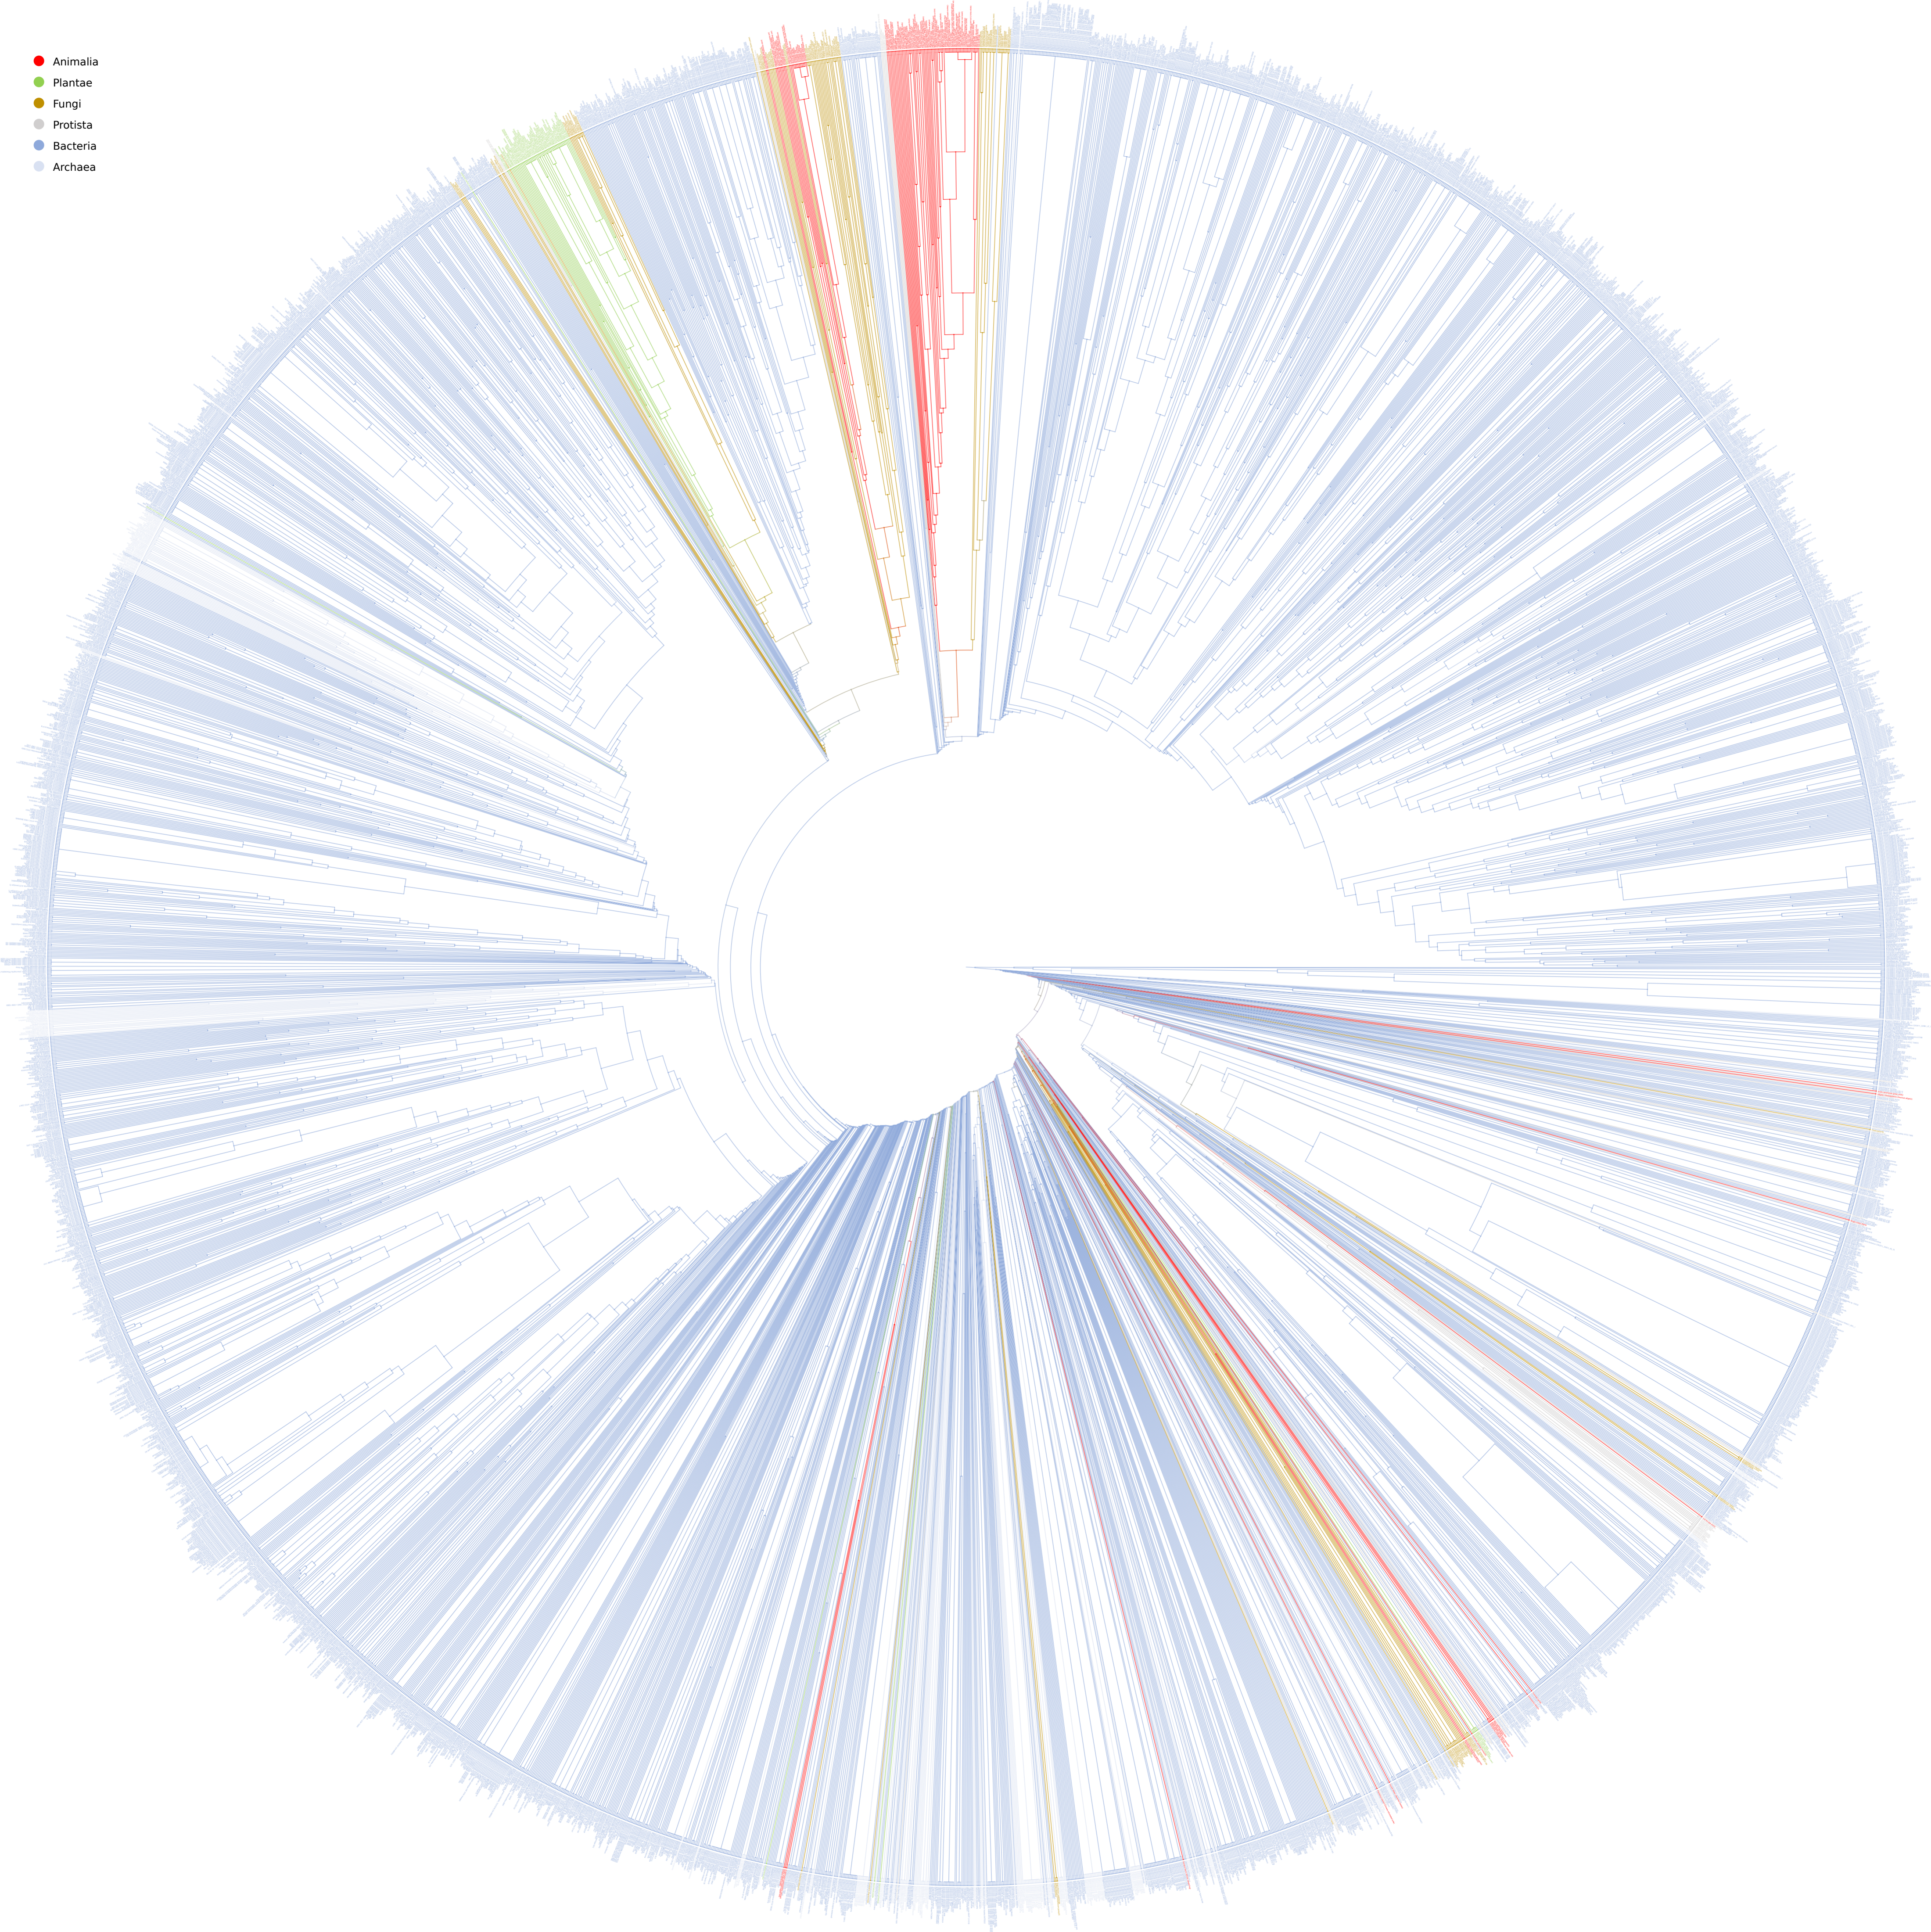

Supplement: pone.0177031.s030.pdf [file pone.0177031.s030.pdf]
